# Supplementary material
Source: PubMed Central journal article supplement (PMC6615033)
Supplement: NIHMS1028026-supplement-Appendix_C.pdf [file NIHMS1028026-supplement-Appendix_C.pdf]

**Appendix C.** Trends in estimated cardiovascular event risk and prevalence of myocardial infarction and strokes in U.S. adults aged  $\geq 18$  years by prediabetes definitions, NHANES 1988 to 2014

|                                   | 1988-1994        | 1999-2004     | 2005-2010     | 2011-2014     | $\Delta$ from 88-94 to 11-14 | P for trend |
|-----------------------------------|------------------|---------------|---------------|---------------|------------------------------|-------------|
| <b>10-yr CVD risk</b>             |                  |               |               |               |                              |             |
| <b>Framingham</b>                 |                  |               |               |               |                              |             |
| FPG 100-125mg/dl or A1c 5.7-6.4%  | 7.7 (7.3-8.1)    | 6.8 (6.5-7.0) | 5.6 (5.3-5.8) | 5.4 (5.1-5.7) | -2.3 (-2.9, -1.7)            | <0.001      |
| FPG 110-125mg/dl or A1c 5.7-6.4%  | 8.1 (7.6-8.6)    | 6.9 (6.6-7.3) | 5.5 (5.2-5.9) | 5.3 (5.0-5.7) | -2.8 (-3.4, -2.2)            | <0.001      |
| FPG 110-125mg/dl or A1c 6.0-6.4%  | 8.7 (7.7-9.7)    | 7.0 (6.4-7.5) | 5.9 (5.5-6.3) | 5.3 (4.8-5.8) | -3.4 (-4.4, -2.4)            | <0.001      |
| FPG 100-125mg/dl and A1c 5.7-6.4% | 9.0 (8.0-9.9)    | 7.0 (6.4-7.6) | 6.0 (5.6-6.5) | 5.6 (5.1-6.2) | -3.4 (-4.6, -2.2)            | <0.001      |
| <b>UKPDS</b>                      |                  |               |               |               |                              |             |
| FPG 100-125mg/dl or A1c 5.7-6.4%  | 8.9 (8.2-9.5)    | 7.7 (7.4-8.1) | 6.3 (6.0-6.6) | 6.1 (5.7-6.6) | -2.7 (-3.5, -1.9)            | <0.001      |
| FPG 110-125mg/dl or A1c 5.7-6.4%  | 9.6 (8.9-10.3)   | 8.4 (7.9-8.9) | 6.6 (6.2-7.0) | 6.2 (5.6-6.7) | -3.4 (-4.2, -2.6)            | <0.001      |
| FPG 110-125mg/dl or A1c 6.0-6.4%  | 9.8 (8.9-10.8)   | 8.7 (7.8-9.5) | 7.2 (6.5-7.8) | 6.3 (5.4-7.2) | -3.5 (-4.7, -2.3)            | <0.001      |
| FPG 100-125mg/dl and A1c 5.7-6.4% | 11.8 (10.6-13.0) | 9.2 (8.5-9.9) | 7.3 (6.7-7.9) | 6.9 (6.0-7.8) | -4.9 (-6.5, -3.3)            | <0.001      |
| <b>ASCVD</b>                      |                  |               |               |               |                              |             |
| FPG 100-125mg/dl or A1c 5.7-6.4%  | 8.9 (8.3-9.4)    | 8.7 (8.2-9.2) | 7.2 (6.7-7.7) | 6.9 (6.4-7.4) | -1.9 (-2.5, -1.3)            | <0.001      |
| FPG 110-125mg/dl or A1c 5.7-6.4%  | 9.1 (8.5-9.6)    | 8.6 (7.9-9.2) | 6.9 (6.3-7.6) | 6.5 (5.9-7.1) | -2.5 (-3.3, -1.7)            | <0.001      |
| FPG 110-125mg/dl or A1c 6.0-6.4%  | 8.7 (7.8-9.5)    | 8.4 (7.4-9.3) | 7.6 (6.8-8.5) | 6.3 (5.2-7.5) | -2.3 (-3.7, -0.9)            | 0.001       |
| FPG 100-125mg/dl and A1c 5.7-6.4% | 9.9 (9.0-10.8)   | 8.8 (7.9-9.8) | 7.4 (6.4-8.4) | 6.6 (5.7-7.5) | -3.3 (-4.5, -2.1)            | <0.001      |
| <b>Previous MI</b>                |                  |               |               |               |                              |             |
| FPG 100-125mg/dl or A1c 5.7-6.4%  | 3.6 (2.8-4.6)    | 3.4 (2.8-4.2) | 3.8 (3.2-4.6) | 3.6 (2.5-5.2) | 0.0 (-1.6, 1.6)              | 0.874       |
| FPG 110-125mg/dl or A1c 5.7-6.4%  | 3.9 (2.9-5.4)    | 3.6 (2.8-4.6) | 3.9 (3.0-5.0) | 3.6 (2.3-5.6) | -0.3 (-2.3, 1.7)             | 0.831       |
| FPG 110-125mg/dl or A1c 6.0-6.4%  | 4.7 (3.5-6.3)    | 3.9 (3.0-5.2) | 3.7 (2.9-4.7) | 3.1 (2.1-4.4) | -1.6 (-3.4, 0.2)             | 0.069       |
| FPG 100-125mg/dl and A1c 5.7-6.4% | 4.4 (3.0-6.3)    | 3.8 (2.3-6.1) | 4.1 (2.9-5.8) | 3.1 (2.0-4.8) | -1.3 (-3.5, 0.9)             | 0.307       |
| <b>Previous Stroke</b>            |                  |               |               |               |                              |             |
| FPG 100-125mg/dl or A1c 5.7-6.4%  | 2.2 (1.5-3.0)    | 2.4 (1.9-3.1) | 2.5 (1.9-3.2) | 2.5 (1.8-3.4) | +0.4 (-0.6, 1.4)             | 0.505       |
| FPG 110-125mg/dl or A1c 5.7-6.4%  | 2.0 (1.4-3.0)    | 2.3 (1.8-3.1) | 2.4 (1.7-3.2) | 2.0 (1.4-2.8) | 0.0 (-1.0, 1.0)              | 0.976       |
| FPG 110-125mg/dl or A1c 6.0-6.4%  | 1.9 (1.2-3.1)    | 2.1 (1.4-3.0) | 2.3 (1.6-3.3) | 1.5 (1.0-2.5) | -0.4 (-1.6, 0.8)             | 0.619       |
| FPG 100-125mg/dl and A1c 5.7-6.4% | 2.1 (1.3-3.4)    | 2.2 (1.3-3.9) | 2.6 (1.7-4.1) | 1.8 (1.0-3.2) | -0.3 (-1.7, 1.1)             | 0.741       |

Abbreviations: NHANES, National Health and Nutrition Examinations Surveys; CVD, cardiovascular disease; UKPDS, United Kingdom Prospective Diabetes Study; ASCVD, Atherosclerotic Cardiovascular Disease guidelines (from American Heart Association and American College of Cardiology); MI, myocardial infarction; yr, year; FPG, fasting plasma glucose; A1c, glycated hemoglobin

10-yr CVD risk calculated using Framingham, UKPDS, and ASCVD risk scores

All analyses adjusted for age, sex, and race/ethnicity

P for trend: Calculated for each glycemic status group by including a continuous variable for the midpoint of each survey period in logistic regression models; significant values indicated variation over time within glycemic groups
