# Supplementary material
Source: PubMed Central journal article supplement (PMC6615033)
Supplement: NIHMS1028026-supplement-Appendix_D.pdf [file NIHMS1028026-supplement-Appendix_D.pdf]

**Appendix D.** Trends in prevalence of CVD event risks among U.S. adults aged  $\geq 18$  years with no prior CVD history\* by glycemic status, NHANES 1988 to 2014, NHANES 1988 to 2014

|                        | 1988-1994        | 1999-2004        | 2005-2010        | 2011-2014        | $\Delta$ from 88-94 to 11-14 | P interaction |
|------------------------|------------------|------------------|------------------|------------------|------------------------------|---------------|
|                        | n=8007           | n=6640           | n=7861           | n=5463           |                              | P trend       |
| <b>10-yr CVD risk</b>  |                  |                  |                  |                  |                              |               |
| <b>Framingham</b>      |                  |                  |                  |                  |                              | <0.001        |
| Diagnosed diabetes     | 15.2 (13.7-16.7) | 13.1 (12.3-13.8) | 10.7 (10.1-11.2) | 10.8 (9.9-11.7)  | -4.4 (-6.0, -2.8)            | <0.001        |
| Undiagnosed diabetes   | 9.7 (8.8-10.7)   | 8.8 (7.8-9.9)    | 6.3 (5.4-7.1)    | 7.9 (5.5-10.2)   | -1.8 (-4.3, 0.7)             | 0.033         |
| Prediabetes            | 7.2 (6.8-7.6)    | 6.4 (6.2-6.7)    | 5.3 (5.1-5.5)    | 5.2 (4.9-5.5)    | -2.0 (-2.4, -1.6)            | <0.001        |
| Normal glycemic status | 5.4 (5.2-5.6)    | 5.3 (5.2-5.5)    | 4.7 (4.5-4.8)    | 4.7 (4.6-4.9)    | -0.7 (-1.0, -0.4)            | <0.001        |
| <b>UKPDS</b>           |                  |                  |                  |                  |                              | <0.001        |
| Diagnosed diabetes     | 19.3 (17.2-21.4) | 15.9 (14.7-17.1) | 11.7 (11-12.5)   | 12.7 (11-14.3)   | -6.6 (-9.3, -3.9)            | <0.001        |
| Undiagnosed diabetes   | 15.1 (13.3-16.9) | 13.7 (11.1-16.3) | 10.4 (8.7-12.2)  | 10.9 (8.2-13.6)  | -4.2 (-7.5, -0.9)            | 0.002         |
| Prediabetes            | 8.6 (8.0-9.2)    | 7.5 (7.2-7.9)    | 6.2 (5.9-6.5)    | 6.0 (5.6-6.5)    | -2.6 (-3.3, -1.9)            | <0.001        |
| Normal glycemic status | 6.0 (5.7-6.3)    | 5.9 (5.6-6.1)    | 5.2 (5.0-5.4)    | 5.2 (4.9-5.4)    | -0.8 (-1.2, -0.4)            | <0.001        |
| <b>ASCVD</b>           |                  |                  |                  |                  |                              | 0.170         |
| Diagnosed diabetes     | 19.2 (17.3-21.1) | 17.3 (15.9-18.7) | 15.9 (14.8-17.0) | 16.0 (14.5-17.5) | -3.2 (-5.4, -1.0)            | 0.003         |
| Undiagnosed diabetes   | 18.9 (16.4-21.4) | 18.7 (16-21.3)   | 18.2 (16.3-20.1) | 17.6 (11.7-23.5) | -1.3 (-7.7, 5.1)             | 0.653         |
| Prediabetes            | 7.7 (7.3-8.1)    | 7.6 (7.2-8.1)    | 6.3 (5.8-6.7)    | 6.2 (5.6-6.7)    | -1.5 (-2.2, -0.8)            | <0.001        |
| Normal glycemic status | 6.3 (5.9-6.6)    | 6.5 (6.2-6.8)    | 5.6 (5.3-5.9)    | 5.5 (5.1-5.9)    | -0.8 (-1.4, -0.2)            | <0.001        |

\*excludes adults with self-reported history of congestive heart failure, myocardial infarction, and stroke

Abbreviations: NHANES, National Health and Nutrition Examinations Surveys; CVD, cardiovascular disease; UKPDS, United Kingdom Prospective Diabetes Study; ASCVD, Atherosclerotic Cardiovascular Disease guidelines (from American Heart Association and American College of Cardiology); MI, myocardial infarction; yr, year; FPG, fasting plasma glucose

10-yr CVD risk calculated using Framingham, UKPDS, and ASCVD risk scores

All analyses adjusted for age, sex, and race/ethnicity

P for trend: Calculated for each glycemic status group by including a continuous variable for the midpoint of each survey period in logistic regression models; significant values indicated variation over time *within* glycemic groups
