# Supplementary material
Source: PubMed Central journal article supplement (PMC6615033)
Supplement: NIHMS1028026-supplement-Appendix_E.pdf [file NIHMS1028026-supplement-Appendix_E.pdf]

**Appendix E.** Trends in prevalence of diabetic renal disease markers in U.S. adults aged  $\geq 18$  years by prediabetes definitions, NHANES 1988 to 2014

|                                   | 1988-1994        | 1999-2004        | 2005-2010        | 2011-2014        | $\Delta$ from 88-94 to 11-14 | P for trend |
|-----------------------------------|------------------|------------------|------------------|------------------|------------------------------|-------------|
| <b>Any CKD</b>                    |                  |                  |                  |                  |                              |             |
| FPG 100-125mg/dl or A1c 5.7-6.4%  | 12.4 (10.6-14.4) | 13.1 (11.4-15.1) | 12.4 (10.9-14.2) | 11.4 (9.9-13.1)  | -1.0 (-3.4, 1.4)             | 0.353       |
| FPG 110-125mg/dl or A1c 5.7-6.4%  | 13.5 (11.3-16.0) | 13.6 (11.6-16.0) | 12.2 (10.7-13.9) | 11.7 (9.8-13.8)  | -1.8 (-4.7, 1.1)             | 0.138       |
| FPG 110-125mg/dl or A1c 6.0-6.4%  | 12.0 (10.0-14.4) | 13.7 (10.8-17.2) | 13.8 (11.7-16.2) | 12.7 (10.1-16.0) | 0.7 (-2.8, 4.2)              | 0.676       |
| FPG 100-125mg/dl and A1c 5.7-6.4% | 14.4 (11.8-17.4) | 13.3 (10.7-16.4) | 12.5 (10.1-15.5) | 11.8 (9.2-15.0)  | -2.6 (-6.5, 1.3)             | 0.181       |
| <b>ACR<math>\geq</math>30</b>     |                  |                  |                  |                  |                              |             |
| FPG 100-125mg/dl or A1c 5.7-6.4%  | 9.3 (7.7-11.2)   | 9.1 (7.8-10.6)   | 8.9 (7.7-10.3)   | 7.7 (6.8-8.8)    | -1.6 (-3.6, 0.4)             | 0.118       |
| FPG 110-125mg/dl or A1c 5.7-6.4%  | 9.9 (7.8-12.4)   | 9.7 (7.9-11.8)   | 8.8 (7.5-10.3)   | 7.8 (6.5-9.2)    | -2.1 (-4.6, 0.4)             | 0.074       |
| FPG 110-125mg/dl or A1c 6.0-6.4%  | 9.5 (7.6-11.8)   | 8.8 (6.7-11.6)   | 11.1 (9.0-13.6)  | 8.9 (6.7-11.7)   | -0.6 (-3.7, 2.5)             | 0.960       |
| FPG 100-125mg/dl and A1c 5.7-6.4% | 10.1 (7.5-13.4)  | 9.2 (7.1-11.9)   | 9.8 (7.8-12.3)   | 7.5 (5.6-9.9)    | -2.6 (-6.1, 0.9)             | 0.200       |
| <b>eGFR<math>&lt;</math>60</b>    |                  |                  |                  |                  |                              |             |
| FPG 100-125mg/dl or A1c 5.7-6.4%  | 4.7 (3.9-5.5)    | 5.7 (4.7-6.9)    | 5.0 (4.3-5.9)    | 4.6 (3.7-5.9)    | 0.0 (-1.4, 1.4)              | 0.769       |
| FPG 110-125mg/dl or A1c 5.7-6.4%  | 5.3 (4.3-6.4)    | 5.4 (4.2-6.9)    | 5.0 (4.2-5.9)    | 4.6 (3.5-6.0)    | -0.7 (-2.3, 0.9)             | 0.298       |
| FPG 110-125mg/dl or A1c 6.0-6.4%  | 5.0 (3.7-6.7)    | 6.2 (4.6-8.3)    | 4.9 (4.1-5.9)    | 4.6 (3.6-5.8)    | -0.4 (-2.2, 1.4)             | 0.355       |
| FPG 100-125mg/dl and A1c 5.7-6.4% | 6.5 (5.0-8.4)    | 5.8 (4.2-8.0)    | 4.5 (3.4-6.0)    | 4.8 (3.3-6.9)    | -1.7 (-4.1, 0.7)             | 0.113       |
| <b>Hyperfiltration</b>            |                  |                  |                  |                  |                              |             |
| FPG 100-125mg/dl or A1c 5.7-6.4%  | 5.2 (3.9-6.9)    | 3.3 (2.4-4.4)    | 3.8 (3.0-4.8)    | 4.3 (3.2-5.7)    | -0.9 (-2.9, 1.1)             | 0.500       |
| FPG 110-125mg/dl or A1c 5.7-6.4%  | 5.1 (3.7-7.2)    | 3.8 (2.7-5.2)    | 3.4 (2.8-4.1)    | 4.1 (3.2-5.4)    | -1.0 (-3.0, 1.0)             | 0.269       |
| FPG 110-125mg/dl or A1c 6.0-6.4%  | 4.9 (3.0-8.1)    | 4.4 (3.1-6.4)    | 3.4 (2.4-4.8)    | 3.4 (2.2-5.3)    | -1.5 (-4.5, 1.5)             | 0.198       |
| FPG 100-125mg/dl and A1c 5.7-6.4% | 3.1 (1.9-5.0)    | 3.4 (1.8-6.3)    | 3.5 (2.5-4.8)    | 5.2 (3.4-7.7)    | 2.1 (-0.6, 4.8)              | 0.112       |

NHANES, National Health and Nutrition Examinations Surveys; yr, year; FPG, fasting plasma glucose; A1c, glycated hemoglobin; ACR, albumin-creatinine ratio; eGFR, estimated glomerular filtration rate

Any CKD refers to either of: urine ACR $\geq$ 30 and/or eGFR $<$ 60; Hyperfiltration defined as GFR $\geq$ 135 ml/min/1.73m<sup>2</sup>

All analyses adjusted for age, sex, and race/ethnicity

P for trend: Calculated for each glycemic status group by including a continuous variable for the midpoint of each survey period in logistic regression models; significant values indicated variation over time *within* glycemic groups

P for interaction: significant P-values indicated varying associations between prevalence estimates over time *across* glycemic groups
